# Supplementary material for: Comparisons of the Effect of Different Metal Oxide Nanoparticles on the Root and Shoot Growth under Shaking and Non-Shaking Incubation, Different Plants, and Binary Mixture Conditions
Source: MDPI journal article supplement (doi:10.3390/nano11071653), 2021-06-23
Supplement: s1 [file s1]

Supplementary Materials

# Comparisons of the Effect of Different Metal Oxide Nanoparticles on the Root and Shoot Growth under Shaking and Non-Shaking Incubation, Different Plants and Binary Mixture Conditions

In Chul Kong <sup>1</sup>, Kyung-Seok Ko <sup>2,\*</sup> and Dong-Chan Koh <sup>2</sup>

<sup>1</sup> Department of Environmental Engineering, Yeungnam University, Gyongsan 38541, Korea; ickong@ynu.ac.kr

<sup>2</sup> Geologic Environment Division, Korea Institute of Geoscience & Mineral Resources (KIGAM), Daejeon 34132, Korea; chankoh@kigam.re.kr

\* Correspondence: kyungsok@kigam.re.kr; Tel.: +82-42-868-3162; Fax: +82-42-868-3414

**Table S1.** The two concentrations (high and low) of three nanoparticles (NPs) used in 12 combinations to study the effect of binary NP mixtures in *Lactuca sativa* and *Raphanus sativus*.

| Plant             | NPs (mg/L)                            |            |            | Combinations |
|-------------------|---------------------------------------|------------|------------|--------------|
|                   | CuO                                   | ZnO        | NiO        |              |
| <i>L. sativa</i>  | 0.12 <sup>a</sup> , 0.06 <sup>b</sup> | 0.25, 0.12 | 0.30, 0.15 | 12           |
| <i>R. sativus</i> | 0.18, 0.09                            | 0.62, 0.31 | 1.42, 0.71 | 12           |

<sup>a</sup> high test concentration; <sup>b</sup> low test concentration.

**Table S2.** Soluble metal concentrations from nanoparticles (NPs) under experimental conditions.

| Conditions              | CuO    |                | ZnO    |                 | NiO    |                 |
|-------------------------|--------|----------------|--------|-----------------|--------|-----------------|
|                         | NPs    | Soluble metal  | NPs    | Soluble metal   | NPs    | Soluble metal   |
|                         | (mg/L) | (µg/L)         | (mg/L) | (µg/L)          | (mg/L) | (µg/L)          |
| <i>Lactuca sativa</i>   | 0.2    | 10 ± 1 (5%)    | 0.2    | 12 ± 3 (6%)     | 0.5    | 4 ± 1 (0.8%)    |
|                         | 0.5    | 19 ± 6 (3.8%)  | 0.5    | 33 ± 9 (6.6%)   | 1.0    | 10 ± 1 (1%)     |
|                         | 1.0    | 22 ± 7 (2.2%)  | 1.0    | 65 ± 36 (6.5%)  | 2.0    | 34 ± 5 (1.7%)   |
|                         | 2.0    | 57 ± 20 (2.9%) | 2.0    | 120 ± 59 (6.0%) | 5.0    | 156 ± 16 (3.1%) |
| <i>Raphanus sativus</i> | 0.1    | 4 ± 2 (4%)     | 0.5    | 9 ± 2 (1.8%)    | 1.0    | 3 ± 2 (0.3%)    |
|                         | 0.2    | 11 ± 8 (5.5%)  | 1.0    | 23 ± 13 (2.3%)  | 2.0    | 4 ± 1 (0.2%)    |
|                         | 0.5    | 21 ± 3 (4.2%)  | 1.5    | 42 ± 31 (2.8%)  | 4.0    | 17 ± 6 (0.4%)   |
|                         | 1.0    | 40 ± 1 (4%)    | 2.0    | 55 ± 36 (2.75%) | 5.0    | 37 ± 20 (0.7%)  |

**Table S3.** Preliminary results of DPPH scavenging activity (A<sub>517</sub>).

| Absorbance (517 nm) | Control | CuO (mg/L) |       | ZnO (mg/L) |       |
|---------------------|---------|------------|-------|------------|-------|
|                     |         | 0.5        | 0.25  | 0.5        | 0.25  |
| Extract (no DPPH)   | 0.025   | 0.018      | 0.019 | 0.022      | 0.024 |
| DPPH:extract (1:1)  | 1.012   | 0.908      | 0.964 | 0.981      | 0.987 |
| DPPH:extract (1:2)  | 0.620   | 0.505      | 0.568 | 0.603      | 0.621 |

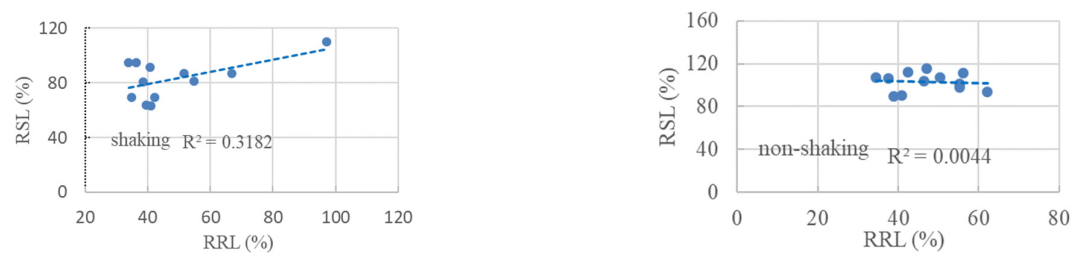

**Figure S1.** Correlations between the root and shoot growth of *Lactuca sativa* under shaking and non-shaking conditions.
